# Supplementary material
Source: Elsevier journal article supplement (https://www.sciencedirect.com/science/article/pii/S0211699517302114)
Supplement: mmc1 [file S0211699517302114:mmc1.docx]

**Tabla supl.1. Características de los pacientes según cuartiles de PTH.**

| Cuartiles de PTH (pg/mL) | <59,0  (N=387) | 59,0-124,4  (N=387) | 124,5-299,0  (N=386) | >299,0  (N=387) | p-valor |
| --- | --- | --- | --- | --- | --- |
| Edad (años) (N, media±SD) | 65,1±13,6 | 62,2±14,0 | 58,7±15,9 | 52,2±15,9 | <0,001 |
| Sexo (N, % hombres) | 58,7 | 55,8 | 53,6 | 47,7 | 0,017 |
| Tiempo en diálisis (meses) (N, media±SD) | 45,8±43,2 | 46,0±43,5 | 58,2±55,0 | 81,8±63,9 | <0,001 |
| Diabetes (N, %) | 40,8 | 38,8 | 27,3 | 15,1 | <0,001 |
| Paratiroidectomía (N, %) | 0,3 | 0 | 0 | 0 | 0,4 |
| Trasplante previo (N, %) | 1,0 | 0,8 | 1,6 | 2,1 | 0,4 |
| Horas de diálisis por semana (horas) (N, media±SD) | 10,5±0,2 | 10,5±0,1 | 10,5±0,2 | 10,5±0,2 | 0,020 |
| Concentración de calcio en el líquido de diálisis |  |  |  |  |  |
| 2,5 mEq/L (N, %) | 0 | 0 | 0 | 0 |  |
| 3,0 mEq/L (N, %) | 0 | 0 | 0 | 0 | -- |
| 3,5 mEq/L (N, %) | 100 | 100 | 100 | 100 |  |
| Prescripción de vitamina D activa (N, %) |  |  |  |  |  |
| Calcitriol (N,%) | 34,6 | 28,9 | 37,0 | 41,6 |  |
| Alfacalcidol (N,%) | 0 | 0 | 0 | 0 | <0,001 |
| Paricalcitol (N, %) | 0 | 0,3 | 0,5 | 4,4 |  |
| Prescripción de captores de fósforo |  |  |  |  |  |
| Calcio (N, %) | 69,0 | 69,3 | 70,7 | 62,0 |  |
| Sevelamer (N, %) | 0 | 0,3 | 0,5 | 3,6 | <0,001 |
| Lantano (N,%) | 0 | 0 | 0 | 0,3 |  |
| Calcio sérico (N, Media±SD) (mg/dL) | 9,4±0,7 | 9,4±0,7 | 9,4±0,7 | 9,4±0,6 | 1,0 |
| Calcio sérico corregido por albúmina (mg/dL) (N, Media±SD) | 9,3±0,7 | 9,3±0,7 | 9,3±0,7 | 9,3±0,8 | 0,9 |
| Fósforo sérico (mg/dL) (N, Media±SD) | 4,1±1,7 | 4,3±1,7 | 4,1±1,8 | 4,3±1,7 | 0,3 |
| PTH (pg/mL) (N, Mediana[IQR]) | 32,1[23,0] | 85,8[33,5] | 183,1[83,4] | 516,2[456,4] | <0,001 |
| PTH (pg/mL) (N, Media±SD) | 33,3±14,1 | 87,9±19,4 | 192,9±49,1 | 737,4±599,4 | <0,001 |
| Fosfatasa alcalina (UI/L) (N, Mediana[IQR]) | 120[77,5] | 113,0[66,0] | 114,0[81,5] | 111,0[73,5] | 0,5 |
| Fosfatasa alcalina (UI/L) (N, Media±SD) | 153,2±119,7 | 159,7±148,7 | 154,6±126,8 | 147,4±116,4 | 0,6 |
| Albúmina (g/dL) (N, Media±SD) | 4,0±0,5 | 4,1±0,4 | 4,1±0,4 | 4,0±0,4 | 0,3 |
| Hemoglobina (g/dL) (N, Media±SD) | 10,7±1,9 | 11,1±1,9 | 10,9±1,7 | 10,9±2,0 | 0,2 |
